# Supplementary material for: Liquid exfoliation of molybdenum metallenes for non-inflammatory photothermal therapy of tumors
Source: Royal Society of Chemistry journal article supplement (doi:10.1039/d4tb00525b), 2024-01-01
Supplement: d4tb00525b1.pdf [file d4tb00525b1.pdf]

## Electronic Supplementary Information

# Liquid exfoliation of molybdenum metallenes for non-inflammatory photothermal therapy of tumors

Chenxin Lu,<sup>‡a</sup> Xiang Huang,<sup>‡a</sup> Zhaoying Jin,<sup>a</sup> Junwei Deng,<sup>a</sup> Zhengbao Zha,<sup>\*a</sup> and Zhaohua Miao<sup>\*a</sup>

<sup>a</sup>*School of Food and Biological Engineering, Hefei University of Technology, Hefei 230009, China*

<sup>‡</sup>*These authors contributed equally: Chenxin Lu, Xiang Huang*

<sup>\*</sup>*Corresponding author. E-mail: zhaohua\_miao@hfut.edu.cn, zbzha@hfut.edu.cn*

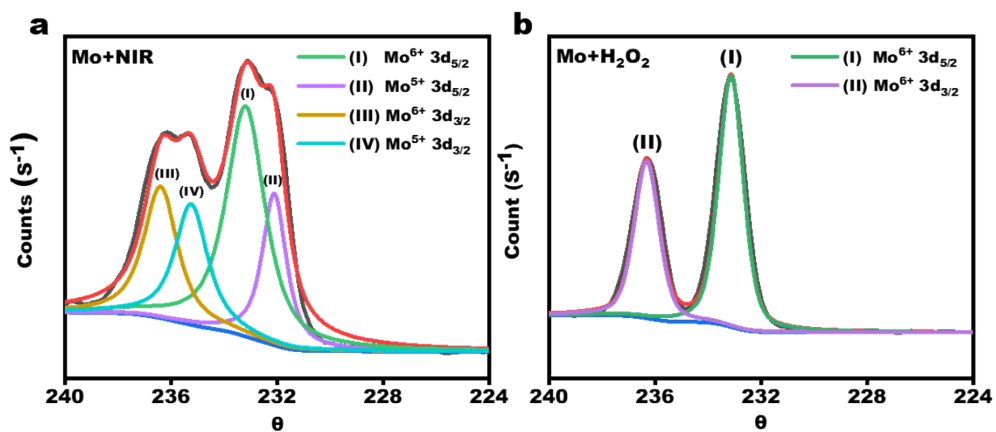

**Fig. S1.** *In vitro* Mo metallene valence change detection. (a) XPS curves of Mo metallene after NIR irradiation. (b) XPS curves of Mo metallene after incubation with H<sub>2</sub>O<sub>2</sub>.

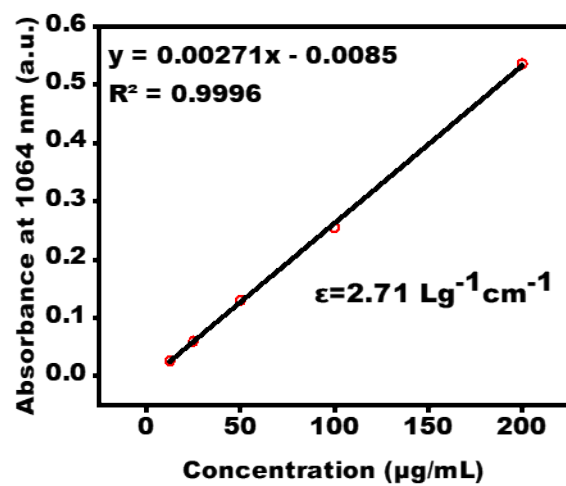

Fig. S2. Vis-NIR absorption standard curve at 1064 nm.

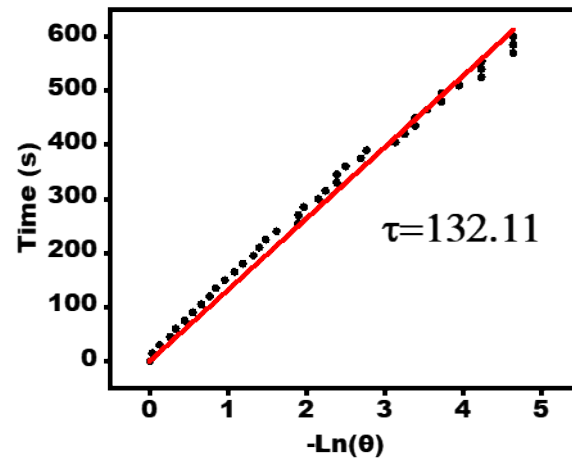

**Fig. S3.** The linear curve fitting of photothermal conversion efficiency of Mo metallenes.

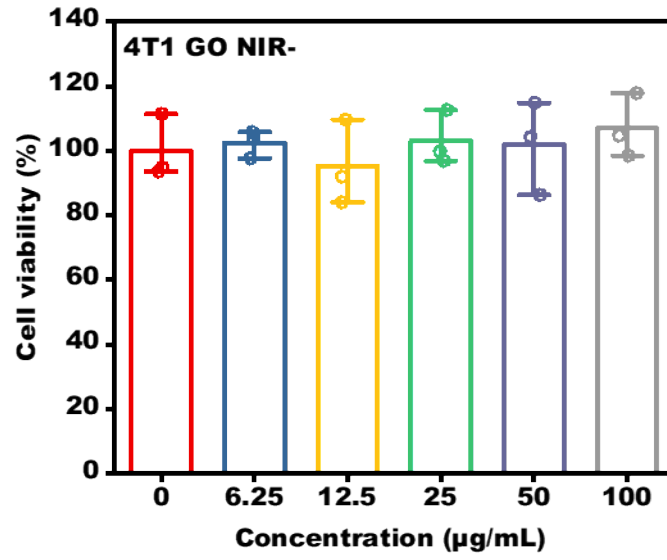

Fig. S4. MTT of 4T1 with different concentration of GO *in vitro*.

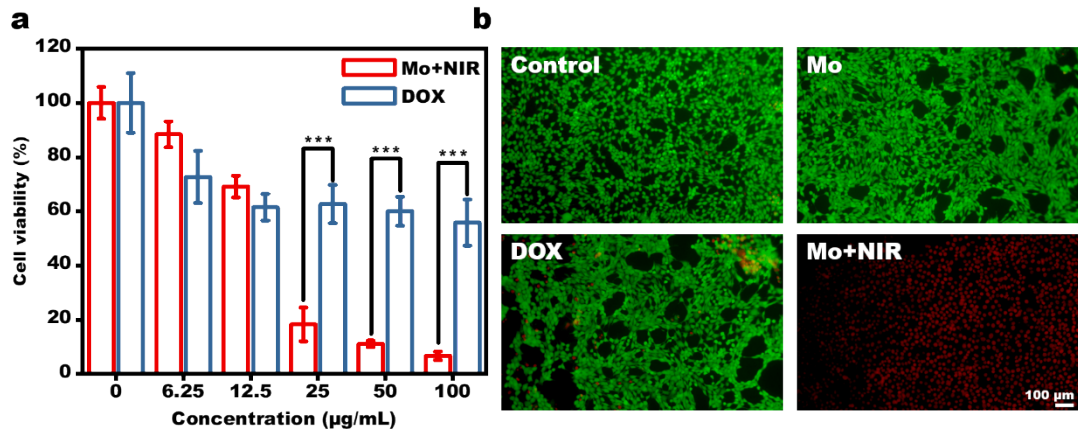

**Fig. S5.** Comparison of antitumor effects of different concentrations of Mo metallenes and DOX. (a) 4T1 cell viability treated with Mo metallene + NIR and DOX. (b) Dead/alive staining of 4T1 cells treated with Mo metallene + NIR and DOX.

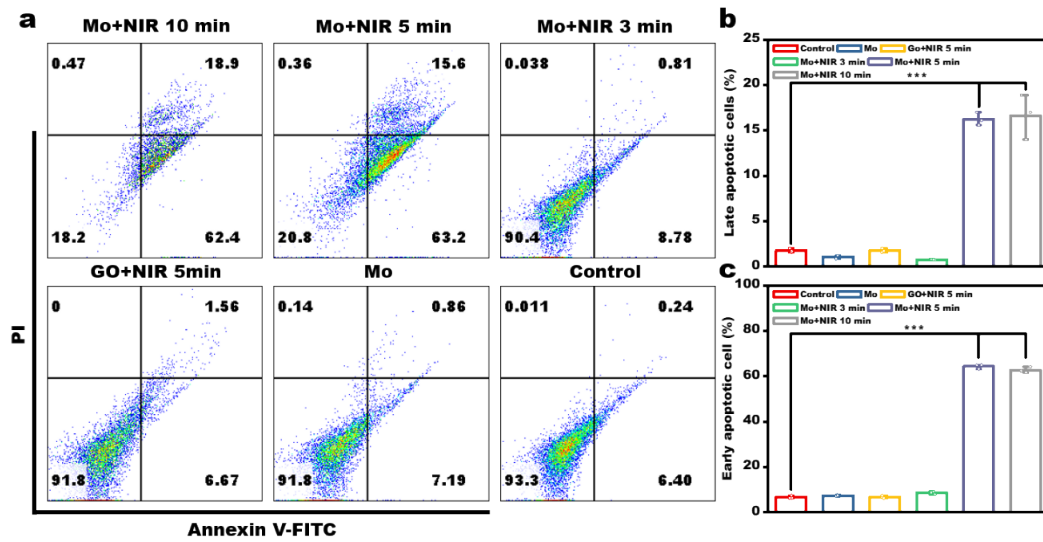

**Fig. S6.** (a) Apoptosis of 4T1 cells after different treatments detected by flow cytometry. (b) The ratio of 4T1 late apoptotic or necrosis cells derived from quantitative analysis of flow cytometry data. (c) The ratio of 4T1 apoptotic cells derived from quantitative analysis of flow cytometry data.

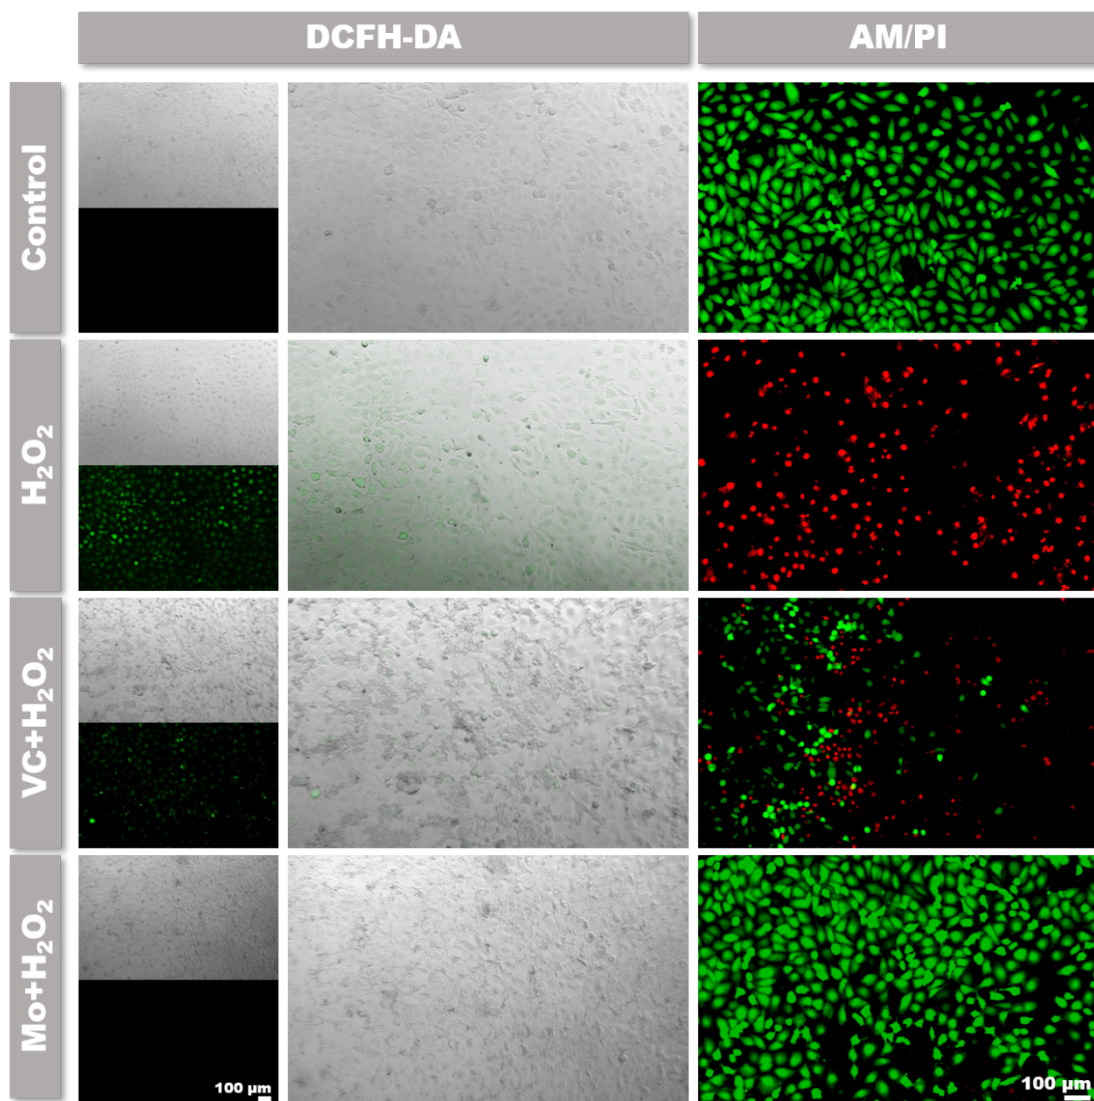

**Fig. S7.** Images of DCFH-DA and dead/live staining of different treatments incubated with HUVEC cells. Scale bar :100  $\mu\text{m}$ .



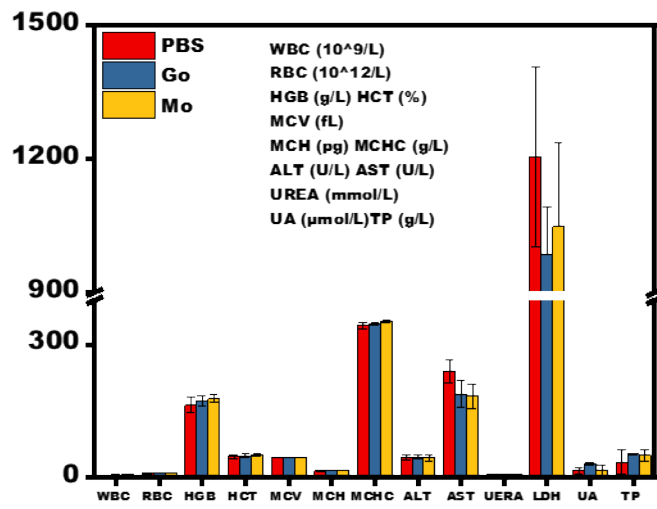

**Fig. S8.** Blood biochemistry analysis and blood routine examination of mice after 14 days of treatment.

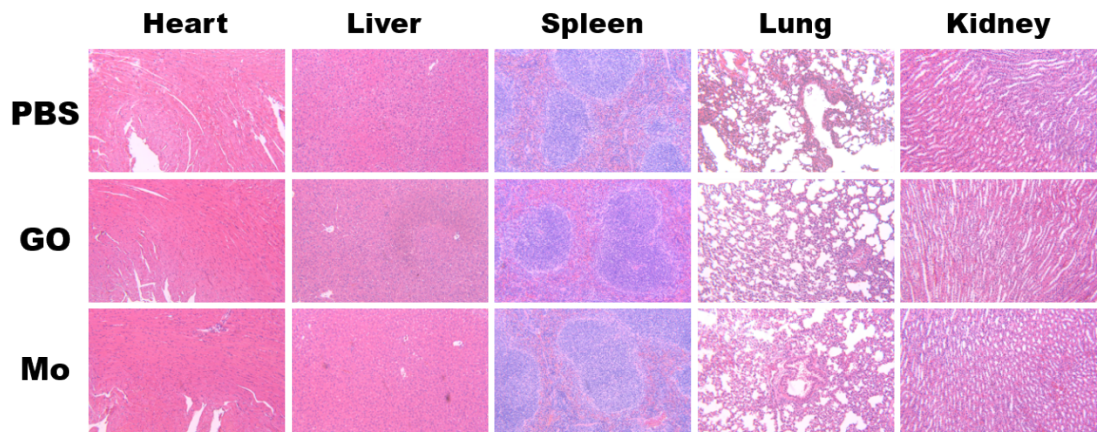

**Fig. S9** H&E staining images of major organs after different treatments.

**Table S1.** Comparison of metallic materials for photothermal therapy of tumors.

| Materials               | PTCE   | Dose                      | Metabolism                               | Reference |
|-------------------------|--------|---------------------------|------------------------------------------|-----------|
| Gold nanorod            | 21%    | 1 mg mL <sup>-1</sup>     | Non-degradability                        | [S1]      |
| PVP-Bi<br>Nanodots      | 30%    | 20 mg kg <sup>-1</sup>    | Clearance through the liver after 7 days | [S2]      |
| PEG-In<br>nanoparticles | 41.3%  | 4 mg mL <sup>-1</sup>     | --                                       | [S3]      |
| PdMo<br>bimetalene      | 69.15% | 40 mg kg <sup>-1</sup>    | 48 h clearance in liver and spleen       | [S4]      |
| SnNSs@PEG               | 48.6%  | 1mg kg <sup>-1</sup>      | clearance in liver and spleen            | [S5]      |
| Mo metallene            | 23.01% | 100 µg mL <sup>-1</sup> , | --                                       | This work |

## References

- [S1] W. I. Choi, J. Y. Kim, C. Kang, C. C. Byeon, Y. H. Kim, and G. Tae, *ACS Nano*, **2011**, 5, 1995–2003
- [S2] P. Lei, R. An, P. Zhang, S. Yao, S. Song, L. Dong, X. Xu, K. Du, J. Feng and H. Zhang, *Advanced Functional Materials*, **2017**, 27, 1702018.
- [S3] Y. Chen, H. Wu, H. Zhou, Z. Miao, F. Hong, Q. Zhao, Z. Tao, Y. Ma, W. Zhao and Z. Zha, *ACS Applied Materials & Interfaces*, **2021**, 13, 46343-46352.
- [S4] L. Bai, W. Yi, Y. Wang, Y. Tian, B. Zhou, T. Yi, P. Zhang, X. Cheng, J. Si, X. Hou and J. Hou, *Journal of Materials Chemistry B*, **2021**, 9, 6441-6459.
- [S5] J. Ouyang, L. Zhang, L. Li, W. Chen, Z. Tang, X. Ji, C. Feng, N. Tao, N. Kong, T. Chen, Y. N. Liu and W. Tao, *Nano-Micro Letters*, **2021**, 13, 90.
